# Supplementary material
Source: PubMed Central journal article supplement (PMC3531649)
Supplement: CJN.00200112_CJN00200112SupplementaryData.pdf [file CJN.00200112_CJN00200112SupplementaryData.pdf]

Supplemental Tables 1a-d.

a.

| Imputed AKI Stage<br>(eGFR 75) Total Cohort | 0    | 1   | 2   | 3   | Total |
|---------------------------------------------|------|-----|-----|-----|-------|
| Real AKI Stages 0                           | 5028 | 457 | 53  | 6   | 5544  |
| 1                                           | 262  | 377 | 89  | 20  | 748   |
| 2                                           | 21   | 37  | 49  | 21  | 128   |
| 3                                           | 0    | 2   | 20  | 60  | 82    |
| Total                                       | 5311 | 873 | 211 | 107 | 6502  |

Total misclassification 15.2%(95%CI: 14.3-16.0),

Misclassification if Stage II + III used to define injury 3.5%(95%CI: 3.1-4.0%)

b.

| Imputed AKI Stage<br>(Full MI + SCr) Total Cohort | 0    | 1   | 2  | 3  | Total |
|---------------------------------------------------|------|-----|----|----|-------|
| Real AKI Stage 0                                  | 5375 | 169 | 0  | 0  | 5544  |
| 1                                                 | 396  | 330 | 21 | 1  | 748   |
| 2                                                 | 17   | 62  | 44 | 5  | 128   |
| 3                                                 | 0    | 9   | 16 | 57 | 82    |
| Total                                             | 5788 | 570 | 81 | 63 | 6502  |

Total misclassification 10.7%(95% CI: 10.0-11.5), p<0.001 compared to eGFR 75

Misclassification if Stage II + III used to define injury 1.7%(95%CI: 1.4-2.0), p<0.001 compared to eGFR 75

c.

| Imputed AKI Stage<br>(eGFR 75) baseline eGFR<60 | 0   | 1   | 2   | 3  | Total |
|-------------------------------------------------|-----|-----|-----|----|-------|
| Real AKI Stages 0                               | 432 | 392 | 53  | 6  | 883   |
| 1                                               | 0   | 82  | 78  | 20 | 180   |
| 2                                               | 0   | 0   | 4   | 17 | 21    |
| 3                                               | 0   | 0   | 0   | 34 | 34    |
| Total                                           | 432 | 474 | 135 | 77 | 1118  |

Total misclassification 50.6%(95% CI: 47.7-53.5)

Misclassification if Stage II + III used to define injury 14.0% (95% CI: 12.0-16.1)

d.

| Imputed AKI Stage<br>(Full MI + SCr) baseline<br>eGFR<60 | 0   | 1   | 2  | 3  | Total |
|----------------------------------------------------------|-----|-----|----|----|-------|
| Real AKI Stage 0                                         | 747 | 136 | 0  | 0  | 883   |
| 1                                                        | 33  | 133 | 13 | 1  | 180   |
| 2                                                        | 0   | 7   | 13 | 1  | 21    |
| 3                                                        | 0   | 0   | 0  | 34 | 34    |
| Total                                                    | 780 | 276 | 26 | 36 | 1118  |

Total misclassification 17.1%(95%CI: 14.9-19.2), p<0.001 compared to eGFR 75

Misclassification if Stage II + III used to define injury 1.9%(95% CI: 1.1-2.7), p<0.001 compared to eGFR 75
